# Supplementary material
Source: publisher site journal article supplement (https://www.spandidos-publications.com/4677/downloadSupplementary)
Supplement: Supplementary file 1 [file downloadSupplementary]

**Table SI.** Binding parameters of PB and NPB to HSA at pH 7.4 and 25°C.

|                                                                                                                                                                                                                                                                            | PB              | NPB             |
|----------------------------------------------------------------------------------------------------------------------------------------------------------------------------------------------------------------------------------------------------------------------------|-----------------|-----------------|
| $K_a (x10^6 M^{-1})$                                                                                                                                                                                                                                                       | $0.50 \pm 0.17$ | $0.10 \pm 0.08$ |
| n                                                                                                                                                                                                                                                                          | $0.80 \pm 0.03$ | $2.54 \pm 1.38$ |
| $n \cdot K_a (x10^6 M^{-1})$                                                                                                                                                                                                                                               | $0.41 \pm 0.15$ | $0.25 \pm 0.11$ |
| <p>Binding constant (<math>K_a</math>) and the number of the binding sites on HSA (n) were estimated by ultracentrifugation method. Averages and SD of three separate experiments. PB, phenylbutyrate; NPB, nitrated form of phenylbutyrate; HSA, human serum albumin.</p> |                 |                 |
